# Supplementary material
Source: PubMed Central journal article supplement (PMC3095939)
Supplement: supp_44_3_404__1.pdf [file supp_44_3_404__1.pdf]

**ENDOPLASMIC RETICULUM STRESS INDUCED BY  
SURFACTANT PROTEIN C BRICHOS MUTANTS PROMOTES  
PROINFLAMMATORY SIGNALING BY EPITHELIAL CELLS**

**Jean Ann Maguire, Ph.D., Surafel Mulugeta, Ph.D., and Michael F. Beers, M.D.**

Surfactant Biology Laboratories  
Pulmonary and Critical Care Division  
Department of Medicine  
University of Pennsylvania School of Medicine  
Philadelphia, Pennsylvania 19104

**SUPPLEMENTAL DATA FILE**

# Supplemental Figure 1

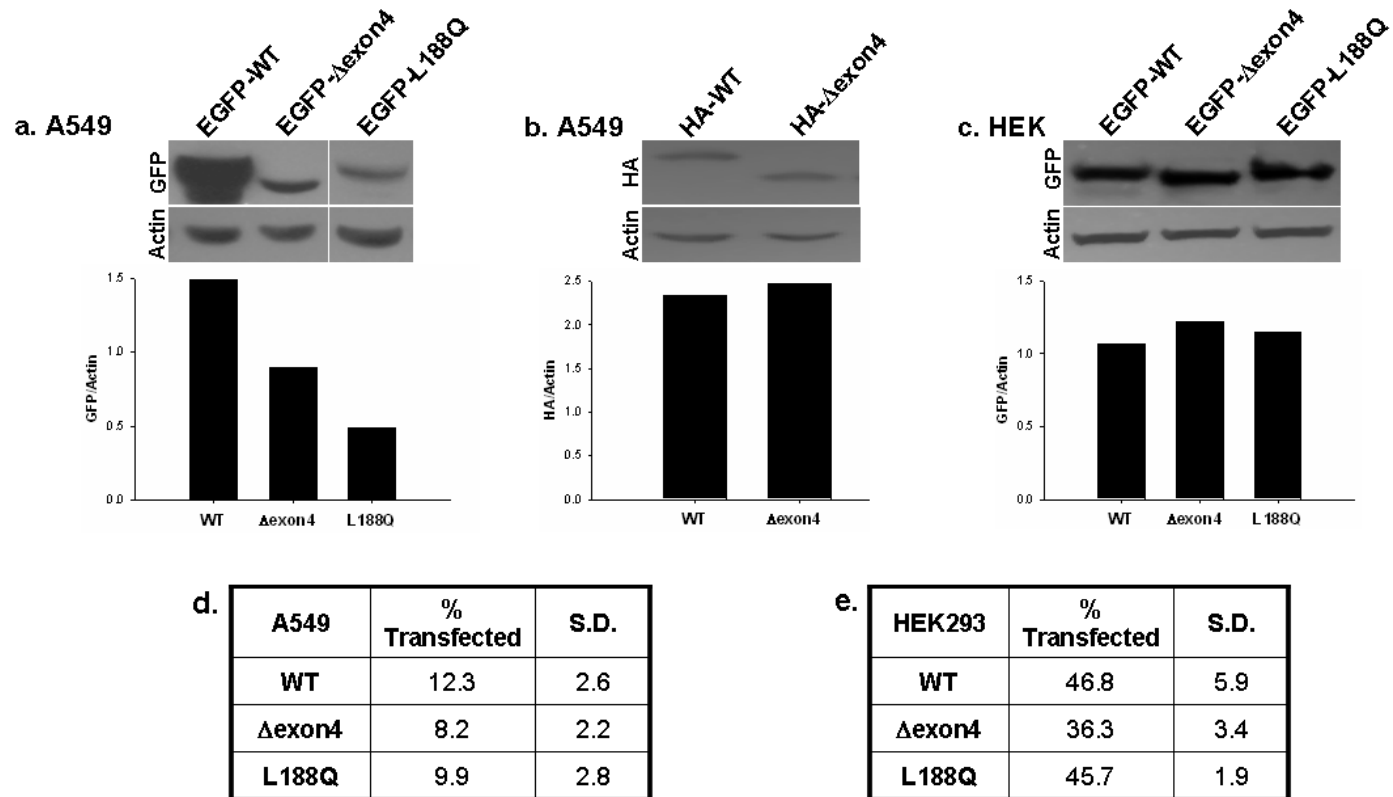

**Supplemental Figure 1. Transfection Efficiency of SP-C Mutants in A549 and HEK293 Cell Lines.** A549 (a, b) and HEK293 (c) cells were transiently transfected with the indicated SP-C constructs, and harvested 48 hours post-transfection. Cell lysates were analyzed for GFP expression, using a monoclonal GFP antibody as described in Methods. An anti-β-actin antibody was used as a loading control. A representative immunoblot of each cell line is shown. Band intensities for the primary translation products were quantified by densitometry, and the ratio of GFP to β-actin was determined. Transfection efficiency was also determined by manual counting of GFP positive cells in transiently transfected A549 (d) and HEK293 cells (e). The ratio of GFP-labeled to total cells was determined across 8 separate experiments, counting a minimum of 5 fields per condition. Results were averaged and expressed as a percentage of GFP positive cells.

## Supplemental Figure 2

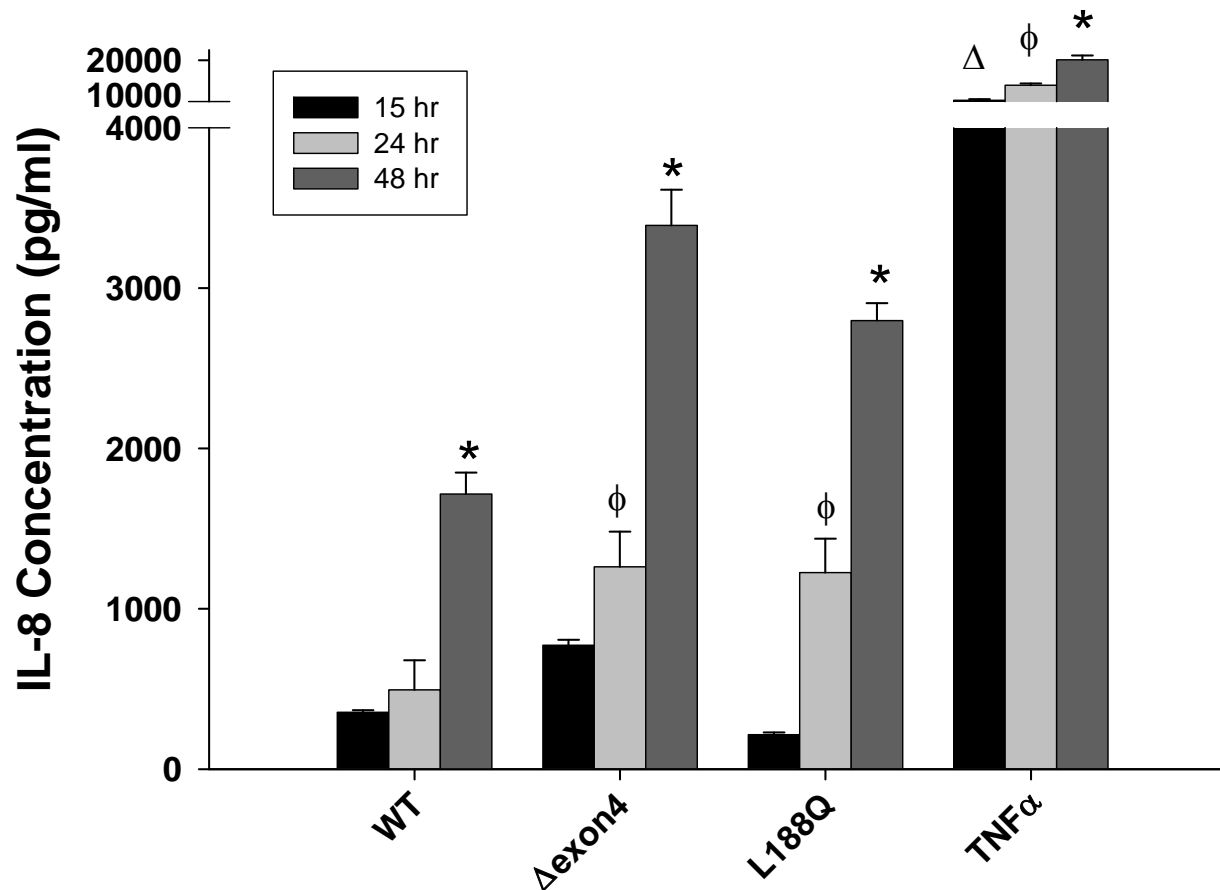

**Supplemental Figure 2. Time dependent Induction of IL-8 Release in SP-C BRICHOS Expressing Cells.** A549 cells were transiently transfected with the indicated GFP-tagged control, SP-C wild type, or mutant constructs using Lipofectamine 2000 reagent. Media was collected at 15, 24 and 48 hours post-transfection and IL-8 was measured by ELISA as described in *Methods*. In parallel, positive controls were generated for each of the 3 time points by treatment of untransfected cells with 10ng/ml TNF $\alpha$  15 hrs prior to harvest. Data are expressed for IL-8 concentration in the media as Mean  $\pm$  S.D. of triplicate samples.  $\Delta$ p<0.05 vs. 15 hour WT control, \*p<0.05 vs. 24 hour WT control, and  $\phi$ p<0.05 vs. 48 hour WT control.

## Supplemental Figure 3

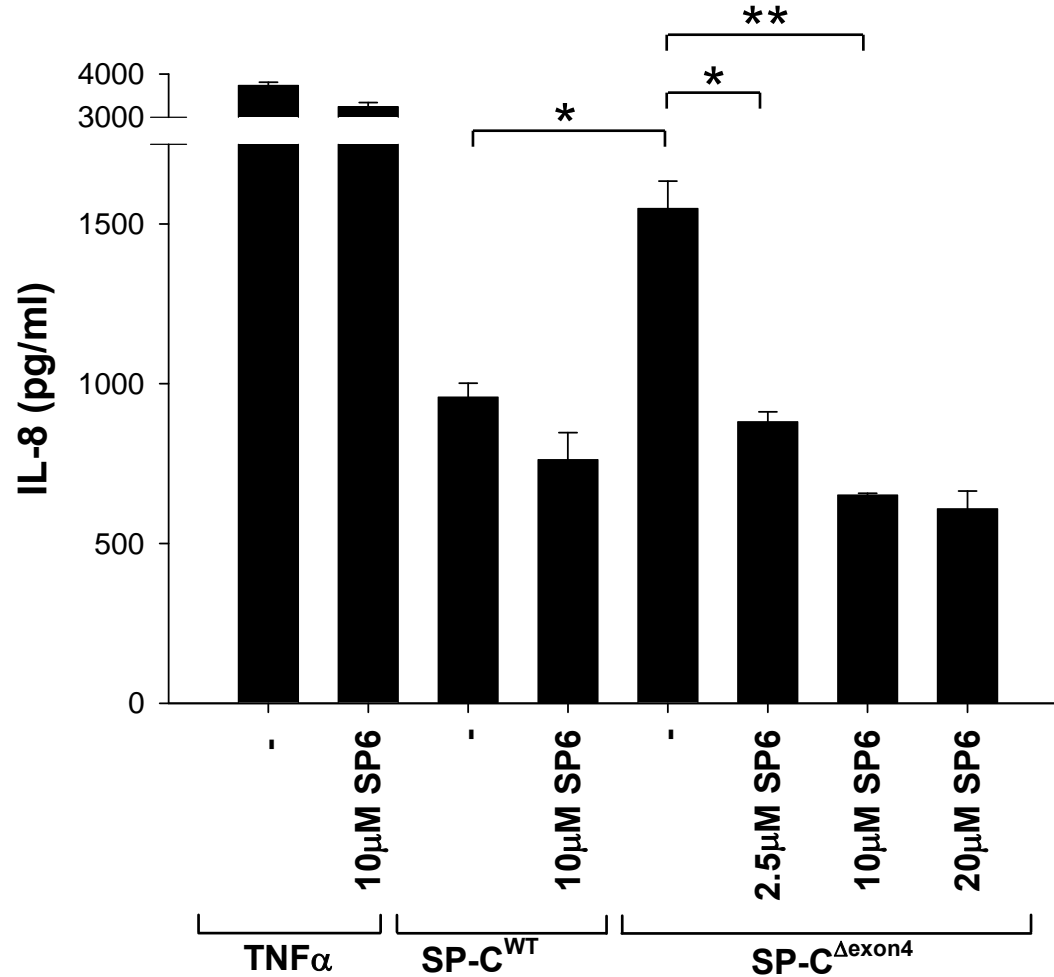

**Supplemental Figure 3. Dose Response of IL-8 Release to SP600125 Inhibitor.** A549 cells were transiently transfected with HA-tagged wild type or  $\Delta$ exon4 SP-C constructs using Lipofectamine 2000 reagent. Twenty-four hours post-transfection, the indicated concentration of SP600125 was added to specified samples. An overnight treatment of 10ng/ml TNF $\alpha$  was used as a positive control. Media was collected 48 hours post-transfection, and IL-8 was measured by ELISA as described in *Methods*. Data is expressed as the mean IL-8 concentration  $\pm$  S.D. of triplicate samples.

## Supplemental Figure 4

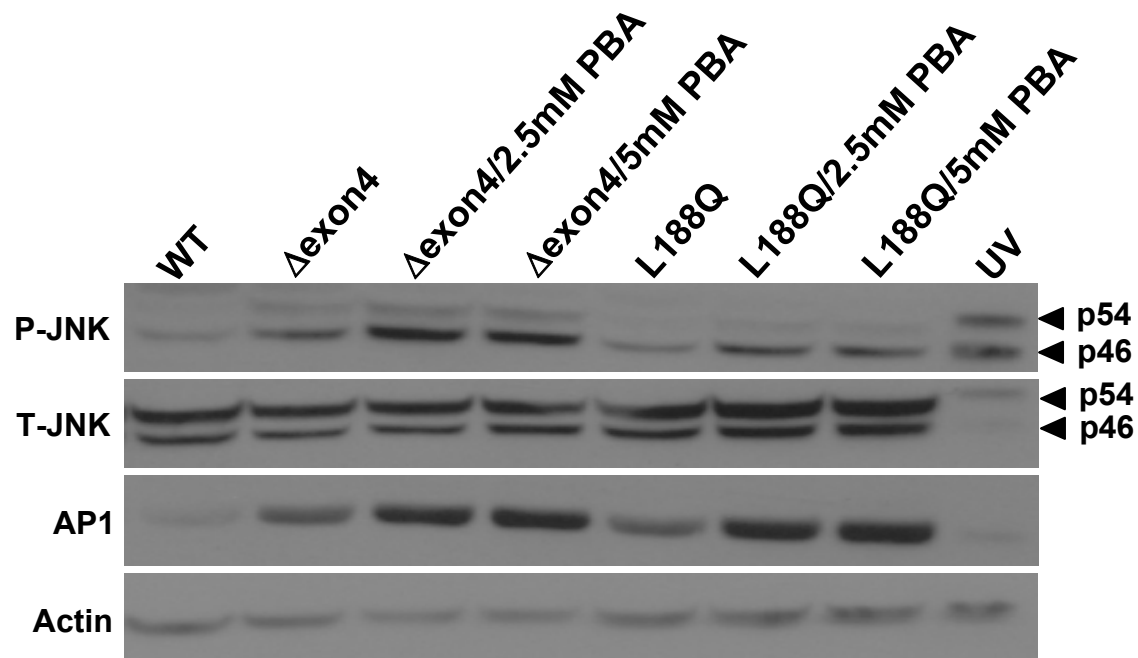

**Supplemental Figure 4. 4-PBA increases JNK and AP1 activity in HEK cells expressing SP-C BRI CHOS mutants.** HEK293 cells were transiently transfected with the indicated control or EGFP-SP-C constructs. Eight hours post-transfection, increasing concentrations of 4-PBA were added to SP-C $\Delta$ exon4 transfected cells and harvested 48 hours post-transfection. UV treatment (40mJ/cm<sup>2</sup>) was used as a positive control. Cell lysates were analyzed for Phospho-SAPK/JNK, total SAPK/JNK, and Phospho-c-Jun (AP1) expression. An anti- $\beta$ -actin antibody was used as a loading control. Blots represent results from two experiments.
